# Supplementary material for: A Co-CRISPR Strategy for Efficient Genome Editing inCaenorhabditis elegans
Source: Oxford University Press journal article supplement (doi:10.1534/genetics.114.166389), 2014-05-31
Supplement: genetics.114.166389-2.pdf [file genetics.114.166389-2.pdf]

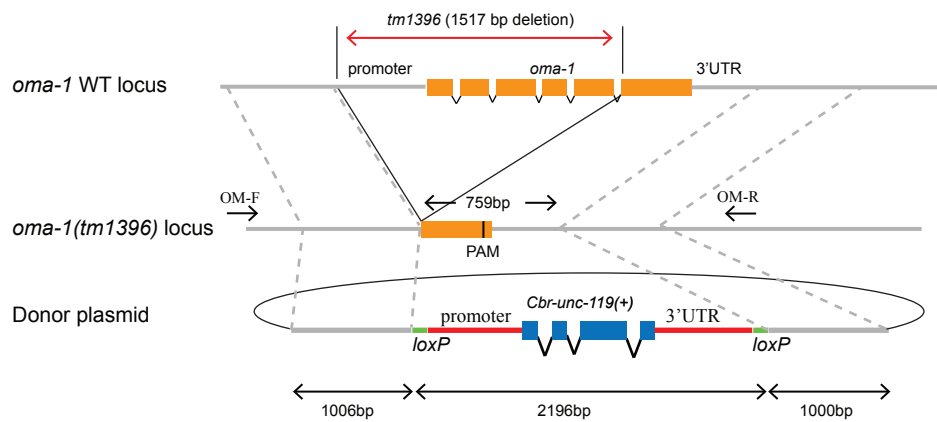

Figure S4. Selection/counterselction experiment to delete the entire *oma-1(tm1396)* locus. Schematic of the Cas9/sgRNA target site and the donor plasmid containing *Cbr-unc-119(+)* flanked by *loxP* sites and 1 kb homology arms. The indicated primers OM-F and OM-R were used for PCR analysis.
